1

1 **LncRNA antigens- a novel resource to improve immunotherapy efficacy**

2 **predictions in Melanoma**

3 **Authors**

4 Sumaira Malik, School of Mathematical and Statistical Sciences, University of

5 Galway, Ireland, s.malik3@nuigalway.ie

6 Aaron Golden, School of Natural Sciences, University of Galway, Ireland,

7 aaron.golden@universityofgalway.ie

8 Corresponding author: Sumaira Malik, s.malik3@nuigalway.ie

9 **Key Words**

10 Immunotherapy efficacy, Biomarker, LncRNA sORFs, Prognostic value, Antigen

11 load, Melanoma, Tumor immune response

## 12 **Abstract**

### 13 **Background:**

14 ICI (immune checkpoint inhibitor) therapy is one of the most promising treatments for  
15 melanoma. ICI response however varies among patients, emphasizing the importance  
16 of identifying genomic biomarkers to predict likely therapeutic efficacy in advance of  
17 treatment. We hypothesised that a lncRNA based immunogenicity (lnc-IM) score  
18 could be used to predict individual response to ICI treatment, and that this could  
19 complement the existing criterion for ICI selection based on tumor mutation burden  
20 (TMB).

### 21 **Methodology:**

22 The TCGA-SKCM (n=101) and the ICI treated UCLA (n=25), MSKCC (n=16) and  
23 DFCI (n=40) melanoma cohorts were used in this study, involving both clinical and  
24 transcriptomic data. Each patient was assigned an lnc-IM score based on the number  
25 of lncRNA sORF derived peptides predicted to be presented by their tumor's MHC-I  
26 genotype. For the ICI treated cohorts, a combined antigen score was defined as a sum  
27 of neo-antigen load (derived from TMB) and lnc-IM score. A logistic regression-  
28 based classifier was used to predict ICI responses based on these combined antigen  
29 scores.

### 30 **Results:**

31 Survival analysis showed improved overall survival among patients with low lnc-IM  
32 scores (HR= 0.39, p=0.009) in the TCGA-SKCM cohort. We also observed a negative  
33 association between tumor immune cell concentration and lnc-IM scores, with low  
34 lnc-IM groups showing higher anti-tumor immune cell concentrations . Using the ICI  
35 treated cohorts, we demonstrated that a classifier based on combined antigen scoring  
36 improved the prediction of immunotherapy outcomes as compared to using TMB  
37 alone, yielding an area under the curve (AUC) of 0.71 with an accuracy of 0.54 and  
38 recall of 1. We also demonstrated a reduced rate of false negatives (14%) by using a  
39 combined antigen score as compared to the use of TMB alone (33%) in ICI treated  
40 cohorts.

41 **Conclusion:** Our findings suggest that the use of combined antigen scores (using lnc-  
42 IM scores along with TMB derived neoantigen load) have potential in improving  
43 immunotherapy efficacy predictions. Prospective validation in larger cohort sizes is  
44 warranted.

45 **KEY MESSAGES:**

46 **What is already known on this topic**

47 Previous studies have established actionable associations between TMB neoantigen  
48 load and immunotherapy responses.

49 **What this study adds**

50 This study introduces lnc-IM scores as a novel metric that predicts patients antigen  
51 load based on translatable lncRNAs expression. These lnc-IM scores when combined  
52 with TMB associated neoantigen load indicate an improvement in immunotherapy  
53 efficacy predictions.

54 **How this study might affect research, practice or policy**

55 Future research is needed to further validate lnc-IM scores as a predictive biomarker  
56 for immunotherapy response in various cancer types. The use of lnc-IM scores can  
57 empower clinicians to make more informed decisions about administering  
58 immunotherapy treatments, improving patient outcomes.

## 59 INTRODUCTION

60 Self versus non-self discrimination by T cells is a hallmark of cancer evasion by the  
61 immune response [1]. T cells eliminate cancer cells by recognizing tumor-specific  
62 antigens presented on the tumor cell's surface by MHC-I molecules [2]. Immune and  
63 tumor cells possess "checkpoint proteins" such as PD-1, CTLA4 and PDL1 that keep  
64 such immune responses in check with the binding of such checkpoint proteins  
65 restricting T cells from killing tumor cells. Immune checkpoint inhibitor therapy (ICI)  
66 is a promising immunotherapy that restores the T cells' capacity to attack and  
67 eliminate tumor cells by blocking such checkpoint proteins [3].

68 The use of ICI therapy has been a significant achievement in the last decade for  
69 cancer treatment and has demonstrated clear improvements in the survival rate of  
70 cancer patients. Its use to date has been approved for multiple cancer types, including  
71 melanoma - one of the first cancers to be treated with this therapy [4]. Despite some  
72 remarkable successes, response to ICI therapy varies widely among individual  
73 patients, emphasizing the importance of identifying genomic biomarkers to try and  
74 predict an individual's likely response in advance of treatment. Tumor mutation  
75 burden (TMB), programmed cell death ligand 1 (PDL1), and mismatch repair defect  
76 (dMMR)/microsatellites Instability (MSI) are some of the currently FDA-approved  
77 predictive biomarkers of ICI efficacy, of which TMB is the most widely used [5,6].  
78 High TMB has been shown to predict improved therapeutic efficacy to ICI therapy in  
79 various cancer types [7]. High TMB is associated with a high neoantigen burden [7];  
80 hence, ICI therapy for patients whose cancers have a high TMB would be expected to  
81 elicit significant T cell responses against those antigens, resulting in enhanced tumor  
82 cell attrition. Although many trials have demonstrated the usability of TMB in clinical

83 practices, a recent study has questioned the concept of the universal usage of TMB as  
84 a predictor of ICI efficacy [8], arguing that TMB prediction power is only accurate to  
85 a subset of patients, and using TMB as a sole predictor of ICI response might deprive  
86 potential patients who might otherwise respond to ICI therapy .

87 TMB-associated antigens (neoantigens) are derived from non-synonymous missense  
88 mutations and originate from the coding region of the genome that encodes proteins  
89 [9]. However, TMB is not the only source of antigens. The Encyclopedia of DNA  
90 Elements (ENCODE) revealed that the human genome contains almost 80% of non-  
91 coding RNAs in contrast to the 1.5% that encodes for proteins [10]. Among non-  
92 coding RNAs, those longer than 200 nucleotides in length - collectively known as  
93 long non-coding RNAs or lncRNAs - are of great interest on account of their evident  
94 wide functional diversity [11]. LncRNAs have been studied for their ability to control  
95 regulatory and cellular processes. LncRNAs regulate gene expression both as miRNA  
96 sponges and mRNA sponges [12]. LncRNAs act as transcription regulators by  
97 modifying the chromatin complexes and can activate or repress gene expression.  
98 Moreover, they also control the binding of transcription regulatory factors leading to  
99 the activation of nearby genes [13].

100 LncRNAs have also been shown to be implicated in the creation of MHC-I associated  
101 peptides with additional work demonstrating that a considerable number of tumor-  
102 specific antigens originate from non-coding regions of the genome [14]. LncRNAs'  
103 contribution to the cancer immunopeptidome is a topic of active research with a  
104 particular focus being an assessment of whether such lncRNA-associated antigens are  
105 associated with elevated cytotoxic T lymphocyte (CTL) responses. High CTL  
106 responses have been associated with better survival and treatment outcomes [15].  
107 Many lncRNAs possess intact short open reading frames (sORF) that can result in the

108 translation of short peptides in the dysregulated cancer transcriptome. Whilst short  
109 peptides have been detected in mass-spectrometry based proteomic studies [16], direct  
110 association of lncRNA sORFs with tumor immune microenvironment (TIM) has yet  
111 to be fully characterised.

112 In this study we explore how the expression of lncRNA sORFs is associated with a  
113 patient's likely response to ICI therapy. Specifically, we derive a novel metric, the lnc-  
114 IM score, that estimates the level of sORF derived peptide presentation based on a  
115 tumour's specific MHC-I genotype. In the first part of our study, we establish the  
116 association of lnc-IM scores with the tumor immune microenvironment – determined  
117 from known cellular biomarkers - and survival predictions in a melanoma cohort  
118 (TCGA-SKCM) without any ICI treatment. In the second part, we utilize three ICI-  
119 treated melanoma cohorts to examine how these lnc-IM scores can be used to improve  
120 ICI efficacy predictions by their integration with each patient's TMB-associated  
121 antigen count.

## 122 **METHODS**

### 123 **Data acquisition**

124 For this study, three different publicly available melanoma cohorts were utilized.  
125 Clinical information and transcriptomic profiles (RNA-seq) of the TCGA-SKCM  
126 cohort were downloaded from The Cancer Genome Atlas (TCGA, <https://portal.gdc.cancer.gov>). HLA typing of the TCGA-SKCM cohort was acquired from a  
127 previous study [17]. A total of 101 patients were included in our analysis based on  
128 the availability of MHC-I genotype and transcriptomic data and having basic clinical  
129 information of age, gender, and overall survival. For ICI efficacy predictions, three  
130 ICI-treated cohorts involving metastatic melanoma (UCLA) [18], melanoma

132 (MSKCC) [19] and metastatic melanoma (DFCI) [20] patient groups were utilized.  
133 Clinical information, including overall survival, treatment response, TMB, neoantigen  
134 load, and transcriptomic data, was retrieved from cBioPortal  
135 (<https://www.cbioportal.org/>) [21]. Based on the criteria mentioned above, a total of  
136 16 patients from the MSKCC cohort, 25 from the UCLA cohort and 40 from DFCI  
137 cohort were selected for subsequent analysis. Tumor immune microenvironment  
138 (TIM) analysis for the TCGA-SKCM cohort was performed using the xCell algorithm  
139 [22], which estimates the the abundance of each immune cell type using expression  
140 profiles of specific gene signatures for each cell type.

#### 141 **Defining Lnc-IM scores**

142 A lncRNA-immunogenicity score (lnc-IM) for a patient was defined as the total  
143 number of presentable lncRNA associated sORFs for that patient's tumor. In the first  
144 step, all lncRNAs associated with short open reading frames (sORFs) were retrieved  
145 from sORFs.org [23]. We selected our desired dataset from sORFs.org based on filters  
146 (*species: humans and biotype = lncRNA*). This initial search resulted in 425 lncRNAs  
147 and will be referred to as translatable lncRNAs in this work. These lncRNAs are  
148 associated with ~ 3000 sORFs, as experimentally proven by different Riboseq  
149 experiments [23]. Among these translatable lncRNAs, only overexpressed lncRNAs  
150 were considered for subsequent analysis. The raw RNA-seq expression of translatable  
151 lncRNAs was acquired from GDC (TCGA, <https://portal.gdc.cancer.gov>) and  
152 cBioPortal (<https://www.cbioportal.org/>). Raw counts were converted to counts per  
153 million (cpm) and log normalized using the edgeR [24] package in R. A translatable  
154 lncRNA was considered for immunogenicity scoring if it passed the criteria of (log  
155 cpm > 6) (Supplemental Figure 1). For each translatable lncRNA, all of its sORFs  
156 were considered for lnc-IM scoring. The Patient Harmonic-mean Best Rank (PHBR)

157 score [17] was then assigned to each sORF, which is an estimate of its derived  
158 peptide's MHC-I presentation likelihood. The PHBR score represents the harmonic  
159 mean of best-ranked peptides (across a given patient's HLA alleles). A sORF with  
160  $PHBR < 0.5$  was used to define a "presentable sORF". The resulting Inc-IM score  
161 (Supplemental Figure 2) represents the total number of presentable sORFs in a given  
162 patient's tumor.

### 163 **Combined antigen score**

164 For the ICI-treated cohorts, a combined antigen score was derived as a sum of each  
165 patient's TMB associated neoantigen burden (using the methodology previously  
166 articulated by [18, 19, 20]) and Inc-IM score (as previously defined by us). Any  
167 overlapping loci between sORFs and neoantigen loci were identified and removed to  
168 avoid the repetition of potential antigens.

### 169 **Statistical Analysis**

170 All analyses were implemented using R (v.3.6.3). Patients were divided into high,  
171 low Inc-IM and combined antigen groups using the *surv\_cutpoint* and  
172 *surv\_categorize* functions from the *survminer* package in R [25]. Cutpoints for  
173 dividing data into high/low immunogenic groups based on Inc-IM scores and  
174 combined antigen scores were chosen for each cohort separately using maximally  
175 ranked statistics (Supplemental Figure 2 and Supplemental Table 1). To determine the  
176 prognostic value of Inc-IM scores, Kaplan Meier survival plots were generated using  
177 the *survival* R package [26]. Spearman's correlation and Wilcoxon test were  
178 conducted using the *ggpubr* [27] R package to determine the association of Inc-IM  
179 scores with tumor immune cells. A significance level of 0.05 was used as the cutoff,  
180 with  $p < 0.05$  considered as the statistically significant difference for all tests.



181 Three ICI-treated cohorts were utilized to determine the predictive value of combined  
182 antigen score. Patients were stratified into the high and low combined immunogenic  
183 groups as described above, and a logistic regression-based classifier was utilized to  
184 predict immunotherapy responses using *stats* [28] package in R. Patients were  
185 randomly assigned to training 70% and test 30% groups. For performance assessment,  
186 the evaluation metrics area under the curve (AUC), accuracy and recall were  
187 calculated using R packages *caret* and *caTools* [29, 30]. We compared the prediction  
188 power of combined antigen scores with TMB using overall response rates, true  
189 positive rates and false negative rates.

## 190 **RESULTS**

### 191 **Lnc-IM scores are associated with anti-tumor immune responses**

192 The tumor immune microenvironment (TIM) is critical in understanding disease  
193 progression and predicting treatment responses. Tumor infiltrating lymphocytes  
194 (TILs) comprises of a complex set of cells in the TIM that play important roles in both  
195 tumor progression and suppression [31]. Based on these roles, these cells can be  
196 divided into anti-tumor and pro-tumor immune cell groups. Tumor-associated  
197 antigens are known to enhance TILs associated immune responses against tumor cells  
198 [31]. To this end, we investigated the association of lncRNA antigen load using lnc-  
199 IM scores with abundance of aDC, B cells, macrophages (M1 and M2), CD8-T cells,  
200 CD4 memory T-cells, T regulatory cells, Th1 and Th2 cells. Six of these cell types  
201 were characterized as anti-tumor immune cells based on their known involvement in  
202 tumor surveillance mechanisms, and three were characterized as pro-tumor immune  
203 cells. Three of six anti-tumor immune cells showed significant differences between  
204 the high and low lnc-IM groups. None of the pro-tumor immune cells showed a

205 significant association between the two groups (Figure 1). Taken together these data  
206 show a significant association between lnc-IM scores and elevated anti-tumor immune  
207 responses.

### 208 **Lnc-IM scores are associated with survival predictions**

209 High tumor infiltrating lymphocytes (TILs) levels have been associated with the  
210 immune system's capacity to eliminate tumor cells [32]. Hence, patients with high  
211 TILs show improved survival compared to those with low TILs. Knowing the value of  
212 TILs in survival prediction [33] and the association of lnc-IM scores with TILs  
213 (Figure 1), we next questioned if lnc-IM scores could be used to predict survival in  
214 the TCGA-SKCM cohort. The results showed that patients in the low lnc-IM category  
215 (n = 59) showed better overall survival (HR = 0.39, p = 0.009) than in the high lnc-IM  
216 category (n = 42) (Figure 2). The overall median survival remained at 1070 days  
217 among the low lnc-IM group, while it reduced to 721 days in the high-IM group. The  
218 baseline characteristics of all patients are shown in Table 1. In order to check the  
219 association of any confounding variables with survival predictions, a multivariate  
220 analysis was performed using age, gender, and cancer stage and lnc-IM scores (Figure  
221 3). None except lnc-IM scores, were significantly associated with survival predictions.

|                      | <b>TCGA-SKCM</b> | <b>UCLA</b> | <b>MSKCC</b> | <b>DFCI</b> |
|----------------------|------------------|-------------|--------------|-------------|
| <b>Gender</b>        |                  |             |              |             |
| <b>Female</b>        | 42               | 11          | 25           | 14          |
| <b>Male</b>          | 59               | 27          | 39           | 26          |
| <b>Age</b>           |                  |             |              |             |
| <b>≤50</b>           | 15               | 7           | 14           | 12          |
| <b>&gt;50</b>        | 86               | 31          | 47           | 28          |
| <b>Treatment</b>     |                  |             |              |             |
| <b>Iplimumab</b>     | -                | -           | 60           | 40          |
| <b>Pembrolizumab</b> | -                | 36          | -            | -           |
| <b>Nivolumab</b>     | -                | 2           | -            | -           |
| <b>Tremelimumab</b>  | -                | -           | 4            | -           |
| <b>Responders</b>    | -                | 21          | 14           | 5           |
| <b>Cancer stage</b>  |                  |             |              |             |
| <b>I/II</b>          | 72               | -           | -            | -           |
| <b>III/IV</b>        | 29               | -           | -            | -           |

*Table 1: Baseline features of cohorts used in this study. For ICI treated cohorts MSKCC, UCLA only subset of patients was selected for downstream analysis (as explained in Methods: Data acquisition).*

## 223 **ICI efficacy predictions based on combined antigen score**

224 Based on the association of lnc-IM scores with both TILs and survival, we evaluated  
225 how such scoring can help improve immunotherapy outcomes prediction. We  
226 hypothesized that using a combined antigen score that includes both lncRNA-  
227 associated antigen scores and TMB-associated neoantigen scores can give a fuller  
228 picture of the tumor's immunopeptidome and so enhance the prediction of ICI  
229 efficacy. Such scoring could also help predict ICI outcomes for patients' whose  
230 tumors are not hypermutated (i.e have a high TMB) and so would not be typically  
231 considered for such treatment. Using both lnc-IM scores and TMB-derived neoantigen

232 load, a combined antigen score was assigned to each patient in the ICI-treated cohorts.

233 A logistic regression-based classifier was then adopted to build a prediction model for

234 immunotherapy outcomes in a combined cohort.

235 We evaluated the model's performance; our results showed an overall AUC of 0.71 in

236 discriminating between responders and non-responders (accuracy = 0.54 and recall =

237 1). We compared this model with TMB based model (FDA approved cutoff > 10

238 mutations/megabase (mut/Mb) was used for dividing patients into high and low TMB

239 groups). The results showed an improved performance of combined antigen scoring as

240 compared to TMB based model (Table 2).

241

| <b>Evaluation Metric</b> | <b>Combined antigen score</b> | <b>TMB</b> |
|--------------------------|-------------------------------|------------|
| AUC                      | 0.71                          | 0.53       |
| Recall                   | 1                             | 0.4        |
| Accuracy                 | 0.54                          | 0.5        |

*Table 2: Evaluation metrics for combined antigen scoring and TMB based models.*

242 **Combined antigen score performs better than TMB alone as biomarker**

243 To further assess whether predictions based on combined antigen score performed  
244 better than using TMB alone, we compared overall response rates (ORR) between the  
245 high TMB group and high combined antigen score in all three ICI treated cohorts.  
246 The ORR improved in high combined antigen score as compared to high TMB among  
247 UCLA and MSKCC cohorts while remaining the same for DFCI cohort (Figure 4).  
248 Among these ICI treated cohorts, 21 out of 81 patients responded to therapy. Using a  
249 high combined antigen score (cutoff criterion showed in Supplemental Material Table  
250 1) as a classifier, 18 out of these 21 were correctly identified as responders. In  
251 contrast, using TMB alone using the same classifier formalism correctly categorizes  
252 only 14 responders. An additional advantage of using a combined strategy is the goal  
253 of minimizing the false negative rate to ensure a robust classification that would not  
254 deprive potential responders of therapy. In Figure 5 we show that the false negative  
255 rate decreased from 33% to 14% using combined antigen score than TMB alone.  
256 These results demonstrate strong evidence that using combined antigen score can help  
257 improve prediction efficacy for patients who might have a low mutation burden but  
258 still can benefit from treatment.

## 259 **DISCUSSION**

260 In this bioinformatics-based study, we introduced a novel metric “lnc-IM scores”  
261 incorporating translatable lncRNA expression and patient MHC-I genotype and  
262 combined them with TMB-associated neoantigen load to create a predictive  
263 biomarker “combined antigen score” for ICI outcomes. TCGA SKCM data revealed  
264 the prognostic value and association of lnc-IM scores with the tumor immune  
265 microenvironment. Additionally, the value of combined antigen score as a predictive  
266 biomarker was investigated using ICI-treated cohorts (UCLA n=27, MSKCC n=21,  
267 DFCI n=40), previously used to investigate TMB-associated ICI response alone.

268 Among the TCGA SKCM cohort, lncRNA immunogenicity scores were significantly  
269 associated with anti-tumor immune responses. TILs associated with anti-tumor  
270 immune responses showed significant differences between high and low lnc-IM  
271 groups. Interestingly, all of these cells were upregulated in the low lnc-IM group.  
272 These findings appear to be in accordance with recent pan-cancer studies where high  
273 TMB/high antigen groups were associated with depressed immune cell infiltration in  
274 different cancer types [34]. One of the possible explanations for such trends could be  
275 that the quality/immunogenicity of antigen being presented is responsible for a better  
276 immune response than the quantity of antigens [35]. A study previously showed that  
277 certain antigens belonging to ERVs were associated with high antigen specific CD8-  
278 Tcell infiltrate as compared to other antigens that were associated with rare antigen  
279 specific CD8-T cells population [15]. Other critical factors are the tumor immune  
280 evasion mechanisms that are prevalent in high immunogenic groups. Cancers tend to  
281 evade immune responses by downregulating MHC molecules and TAP3 proteins, so  
282 these antigens are not efficiently presented on cancer cell surfaces [36]. Hence, we see  
283 a decrease in immune cell infiltration in such cancers.

284 TILs have been linked to prognostic outcomes in various types of cancer. In general,  
285 elevated levels of TILs within a tumor correspond to a more aggressive anti-tumor  
286 immune microenvironment and are associated with better survival outcomes  
287 compared to tumors with low TILs, as previously reported [37]. Our study (as  
288 illustrated in Figure 1 and Figure 2) supports this finding by demonstrating that  
289 patients with low Inc-IM tumors generally had greater anti-tumor TILs and better  
290 survival outcomes than those with high Inc-IM tumors.

291 We hypothesized that using Inc-IM scores along with conventional TMB might help  
292 improve efficacy predictions. We determined that the overall response rates improved  
293 using high combined antigen score as compared to using TMB alone. An essential  
294 factor is to ensure that the combined antigen score based classifier helps decrease the  
295 false negative rate to avoid depriving actual responders of ICI therapy. We have  
296 demonstrated that using the high combined antigen score compared to high TMB  
297 alone cannot only improve the true positive rate but also help decrease the false  
298 negative rate (Figure 5). In these cohorts, using high TMB alone as a biomarker could  
299 deprive 33% of potential responders of potentially efficacious ICI therapy. However,  
300 in our small study we demonstrated by using high combined antigen scores reduced  
301 this percentage to 14%. These findings have specifically highlighted the predictive  
302 power of combined antigen approach scores for responders with low TMB but high  
303 Inc-IM scores.

304 The key limitations of this study are the small sample size, the retrospective nature of  
305 cohorts used, and the variability of the type of ICI treatment administered. ICI  
306 treatments vary based on the type of checkpoint protein targeted (PD-1 or CTLA4).  
307 Both treatments show potential for melanoma treatment with 58% ORR for anti-PD-1  
308 and 38% ORR for anti-CTLA4 therapy in melanoma [38]. Using both primary

309 (TCGA-SKCM) and metastatic cohorts (ICI treated) in our study may have  
310 advantages and limitations. On the one hand, the inclusion of both sample types  
311 increased the sample size of the study, enhancing our ability to identify more  
312 inclusive and robust prognostic and predictive biomarkers. On the other hand, using  
313 both cohorts may present challenges due to the potential differences in molecular  
314 profiles between primary and metastatic tumors. We note however, a recent study  
315 showing no significant difference between primary and metastatic melanoma TMB  
316 [39]. We have demonstrated an association of the lnc-IM score with the TIM,  
317 survival, and ICI outcomes prediction in three different cohorts providing confidence  
318 as regards the added value of the lnc-IM scores as a biomarker. It is also worth noting  
319 that the predictive power of combined antigen scoring was evaluated specifically in  
320 metastatic tumors. Further validation in a larger cohort size is required to determine  
321 the optimal cutoff for the lnc-IM and combined antigen scores.

322 Future research would ideally focus on determining the value of lnc-IM scores in  
323 other cancer types that are not hypermutated yet still respond to ICI therapy, involving  
324 larger cohort sizes.

325 **Acknowledgements:** This project was supported by a Hardiman Research  
326 Scholarship, University of Galway, Ireland

327 **Competing interest declaration:** None declared

328 **Ethics approval:** All the data used in this study were derived from existing publicly  
329 available databases and previously published studies. All the data were pre-  
330 anonymized. Thus, ethical approval was not required.

331 **Data availability statement:** Data can be provided on request.



## 332 **List of Abbreviations**

333 Immune checkpoint inhibitor therapy (ICI)

334 LncRNA based immunogenicity score (lnc-IM score)

335 Tumor mutation burden (TMB)

336 Area under the curve (AUC)

337 Programmed cell death ligand 1 (PDL1)

338 Mismatch repair defect (dMMR)

339 Microsatellites Instability (MSI)

340 Encyclopedia of DNA Elements (ENCODE)

341 Cytotoxic T lymphocyte (CTL)

342 Short open reading frames (sORFs)

343 Tumor immune microenvironment (TIM)

344 The Cancer Genome Atlas (TCGA)

345 Counts per million (cpm)

346 Patient Harmonic-mean Best Rank (PHBR)

347 Tumor infiltrating lymphocytes (TILs)

348 Overall response rates (ORR)

349 Hazard ratio (HR)

350 **REFERENCES**

351

- 352 1. Hanahan D, Weinberg RA. Hallmarks of cancer: The next generation. *Cell*.  
353 2011;144(5):646–74.doi:[10.1016/j.cell.2011.02.013](https://doi.org/10.1016/j.cell.2011.02.013)
- 354 2. Kanaseki T, Torigoe T. Proteogenomics: Advances in cancer antigen research.  
355 *Immunological Medicine*. 2019;42(2):65–70. doi:[10.1080/25785826.2019.1640500](https://doi.org/10.1080/25785826.2019.1640500)
- 356 3. He X, Xu C. Immune Checkpoint Signaling and cancer immunotherapy. *Cell*  
357 *Research*. 2020;30(8):660-9.doi:[10.1038/s41422-020-0343-4](https://doi.org/10.1038/s41422-020-0343-4)
- 358 4. Chen Q, Li T, Yue W. Drug response to PD-1/PD-L1 blockade: Based on biomarkers.  
359 *OncoTargets and Therapy*. 2018;11:4673–83.doi:[10.2147/OTT.S168313](https://doi.org/10.2147/OTT.S168313)
- 360 5. Havel JJ, Chowell D, Chan TA. The evolving landscape of biomarkers for checkpoint  
361 inhibitor immunotherapy. *Nature Reviews Cancer*. 2019;19(3):133–  
362 50.doi:[10.1038/s41568-019-0116-x](https://doi.org/10.1038/s41568-019-0116-x)
- 363 6. Yi M, Jiao D, Xu H, Liu Q, Zhao W, Han X, et al. Biomarkers for predicting efficacy  
364 of PD-1/PD-L1 inhibitors. *Molecular Cancer*. 2018;17(1):129.doi:[10.1186/s12943-  
365 018-0864-3](https://doi.org/10.1186/s12943-018-0864-3)
- 366 7. Kim JY, Kronbichler A, Eisenhut M, Hong SH, van der Vliet HJ, Kang J, et al.  
367 Tumor mutational burden and efficacy of immune checkpoint inhibitors: A systematic  
368 review and meta-analysis. *Cancers*. 2019;11(11):1798.doi:[10.3390/cancers11111798](https://doi.org/10.3390/cancers11111798)
- 369 8. Gurjao C, Tsukrov D, Imakaev M, Luquette LJ, Mirny LA. Limited evidence of  
370 tumour mutational burden as a biomarker of response to immunotherapy. *BioRxiv*.  
371 2020; 26(02):65.doi: <https://doi.org/10.1101/2020.09.03.260265>
- 372 9. Castle JC, Uduman M, Pabla S, Stein RB, Buell JS. Mutation-derived Neoantigens  
373 for cancer immunotherapy. *Frontiers in Immunology*.  
374 2019;10:1856.doi:[10.3389/fimmu.2019.01856](https://doi.org/10.3389/fimmu.2019.01856)
- 375 10. International Human Genome Sequencing Consortium. Initial sequencing and  
376 analysis of the human genome. *Nature*. 2001;409: 860–  
377 921.doi:<https://doi.org/10.1038/35057062>
- 378 11. Zhang F, Zhang L, Zhang C. Long noncoding RNAs and tumorigenesis: Genetic  
379 Associations, molecular mechanisms, and therapeutic strategies. *Tumor Biology*.  
380 2016;37(1):163–75.doi:[10.1007/s13277-015-4445-4](https://doi.org/10.1007/s13277-015-4445-4)
- 381 12. Salmena L, Poliseno L, Tay Y, Kats L, Pandolfi PP. A cerna hypothesis: The Rosetta  
382 Stone of a hidden RNA language? *Cell*. 2011;146(3):353–  
383 8.doi:[10.1016/j.cell.2011.07.014](https://doi.org/10.1016/j.cell.2011.07.014)
- 384 13. Lee JT. Epigenetic regulation by long noncoding RNAs. *Science*.  
385 2012;338(6113):1435–9.doi:[10.1126/science.1231776](https://doi.org/10.1126/science.1231776)
- 386 14. Boon T, Van Pel A. T cell-recognized antigenic peptides derived from the cellular  
387 genome are not protein degradation products but can be generated directly by  
388 transcription and translation of short subgenic regions. A hypothesis.  
389 *Immunogenetics*. 1989;29(2):75–9. doi:[10.1007/BF00395854](https://doi.org/10.1007/BF00395854)

- 390 15. Laumont CM, Vincent K, Hesnard L, Audemard É, Bonneil É, Laverdure J-P, et al.  
391 Noncoding regions are the main source of targetable tumor-specific antigens. *Science*  
392 *Translational Medicine*. 2018;10(470):eaau5516.doi:[10.1126/scitranslmed.aau5516](https://doi.org/10.1126/scitranslmed.aau5516)
- 393 16. Lv D, Chang Z, Cai Y, Li J, Wang L, Jiang Q, et al. TransLnc: A comprehensive  
394 resource for translatable lncrnas extends immunopeptidome. *Nucleic Acids Research*.  
395 2021;50(D1):D413–D420.doi:[10.1093/nar/gkab847](https://doi.org/10.1093/nar/gkab847).
- 396 17. Marty R, Kaabinejadian S, Rossell D, Slifker MJ, van de Haar J, Engin HB, et al.  
397 MHC-I genotype restricts the oncogenic mutational landscape. *Cell*.  
398 2017;171(6):1272–83.doi:[10.1016/j.cell.2017.09.050](https://doi.org/10.1016/j.cell.2017.09.050)
- 399 18. Hugo W, Zaretsky JM, Sun L, Song C, Moreno BH, Hu-Lieskovan S, et al. Genomic  
400 and transcriptomic features of response to Anti-PD-1 therapy in metastatic melanoma.  
401 *Cell*. 2016;165(1):35–44.doi:[10.1016/j.cell.2016.02.065](https://doi.org/10.1016/j.cell.2016.02.065)
- 402
- 403 19. Snyder A, Makarov V, Merghoub T, Yuan J, Zaretsky JM, Desrichard A, et al.  
404 Genetic basis for clinical response to CTLA-4 blockade in melanoma. *New England*  
405 *Journal of Medicine*. 2014;371(23):2189–99.doi:[10.1056/NEJMoa1406498](https://doi.org/10.1056/NEJMoa1406498)
- 406 20. Van Allen EM, Miao D, Schilling B, Shukla SA, Blank C, Zimmer L, Sucker A,  
407 Hillen U, Geukes Foppen MH, Goldinger SM, Utikal J. Genomic correlates of  
408 response to CTLA-4 blockade in metastatic melanoma. *Science*. 2015;350(6257):207-  
409 1.doi:[10.1126/science.aad0095](https://doi.org/10.1126/science.aad0095)
- 410 21. Gao J, Aksoy BA, Dogrusoz U, Dresdner G, Gross B, Sumer SO, et al. Integrative  
411 Analysis of Complex Cancer Genomics and clinical profiles using the cBioPortal.  
412 *Science Signaling*. 2013;6(269):pl1.doi:[10.1126/scisignal.2004088](https://doi.org/10.1126/scisignal.2004088)
- 413 22. Aran D, Hu Z, Butte AJ. xCell: Digitally portraying the tissue cellular heterogeneity  
414 landscape. *Genome Biology*. 2017;18(1):220.doi:[10.1186/s13059-017-1349-1](https://doi.org/10.1186/s13059-017-1349-1)
- 415 23. Olexiouk V, Crappé J, Verbruggen S, Verhegen K, Martens L, Menschaert G.  
416 sORFs.org: A repository of small orfs identified by ribosome profiling. *Nucleic Acids*  
417 *Research*. 2016;44(D1): D324–9.doi:[10.1093/nar/gkv1175](https://doi.org/10.1093/nar/gkv1175)
- 418 24. Robinson MD, McCarthy DJ, Smyth GK. edgeR: A bioconductor package for  
419 differential expression analysis of digital gene expression data. *Bioinformatics*.  
420 2010;26(1):139–40.doi:[10.1093/bioinformatics/btp616](https://doi.org/10.1093/bioinformatics/btp616)
- 421 25. Kassambara A, Kosinski M, Biecek P, Fabian S. Drawing survival curves using  
422 'ggplot2' [R package survminer version 0.4.9]. The Comprehensive R Archive  
423 Network. Comprehensive R Archive Network (CRAN); 2021. Available from:  
424 <https://cran.r-project.org/web/packages/survminer/>
- 425 26. Therneau TM. Survival analysis [R package survival version 3.5-3]. The  
426 Comprehensive R Archive Network. Comprehensive R Archive Network (CRAN);  
427 2023. Available from: <https://cran.r-project.org/web/packages/survival/index.html>
- 428 27. Kassambara A. 'Ggplot2' based publication ready plots [R package ggpubr version  
429 0.6.0]. The Comprehensive R Archive Network. Comprehensive R Archive Network  
430 (CRAN); 2023. Available from:  
431 <https://cran.r-project.org/web/packages/ggpubr/index.html>
- 432 28. R Core Team. R: A language and environment for statistical computing. R  
433 Foundation for Statistical Computing, Vienna, Austria; 2013. Available from:  
434 <http://www.R-project.org/>

- 435 29. Kuhn M. Classification and regression training [R package caret version 6.0-93]. The  
436 Comprehensive R Archive Network. Comprehensive R Archive Network (CRAN);  
437 2022. Available from: <https://cran.r-project.org/web/packages/caret/index.htm> l
- 438 30. Tuszynski J. Package catools. CRAN. Comprehensive R Archive Network (CRAN);  
439 2021. Available from: <https://cran.r-project.org/web/packages/caTools/index.html>
- 440 31. He Z, Gu J, Luan T, Li H, Li C, Chen Z, et al. Comprehensive analyses of a tumor-  
441 infiltrating lymphocytes-related gene signature regarding the prognosis and  
442 immunologic features for immunotherapy in bladder cancer on the basis of WGCNA.  
443 *Frontiers in Immunology*. 2022;13:973974.doi:10.3389/fimmu.2022.973974
- 444 32. Brummel K, Eerkens AL, de Bruyn M, Nijman HW. Tumour-infiltrating  
445 lymphocytes: From prognosis to treatment selection. *British Journal of Cancer*.  
446 2022;128(3):451–8.doi:10.1038/s41416-022-02119-4
- 447 33. Maibach F, Sadozai H, Seyed Jafari SM, Hunger RE, Schenk M. Tumor-infiltrating  
448 lymphocytes and their prognostic value in cutaneous melanoma. *Frontiers in*  
449 *Immunology*. 2020;11:2105.doi:10.3389/fimmu.2020.02105
- 450 34. Wang X, Li M. Correlate tumor mutation burden with immune signatures in human  
451 cancers. *BMC Immunology*. 2019;20(1):4.doi:10.1186/s12865-018-0285-5
- 452 35. Laumont CM, Perreault C. Exploiting non-canonical translation to identify new  
453 targets for T cell-based cancer immunotherapy. *Cellular and Molecular Life Sciences*.  
454 2017;75(4):607–21.doi:10.1007/s00018-017-2628-4
- 455 36. Dhatchinamoorthy K, Colbert JD, Rock KL. Cancer immune evasion through loss of  
456 MHC class I antigen presentation. *Frontiers in Immunology*.  
457 2021;12:636568.doi:10.3389/fimmu.2021.636568
- 458 37. Gooden MJ, de Bock GH, Leffers N, Daemen T, Nijman HW. The prognostic  
459 influence of tumour-infiltrating lymphocytes in cancer: A systematic review with  
460 meta-analysis. *British Journal of Cancer*. 2011;105(1):93–  
461 103.doi:10.1038/bjc.2011.189
- 462 38. Tie EN, Lai-Kwon J, Rtshiladze MA, Na L, Bozzi J, Read T, Atkinson V, Au-Yeung  
463 G, Long GV, McArthur GA, Sandhu S. Efficacy of immune checkpoint inhibitors for  
464 in-transit melanoma. *Journal for immunotherapy of cancer*.  
465 2020;8(1):e000440.doi:10.1136/jitc-2019-000440
- 466 39. Gorris MA, van der Woude LL, Kroeze LI, Bol K, Verrijp K, Amir AL, Meek J,  
467 Textor J, Figdor CG, de Vries IJ. Paired primary and metastatic lesions of patients  
468 with ipilimumab-treated melanoma: high variation in lymphocyte infiltration and  
469 HLA-ABC expression whereas tumor mutational load is similar and correlates with  
470 clinical outcome. *Journal for Immunotherapy of Cancer*.  
471 2022;10(5):e004329.doi:10.1136/jitc-2021-004329  
472

## 473 **FIGURE LEGENDS**

**Figure 1:** Comparison of immune cells abundance between high and low immunogenic groups. A) Pro-tumor immune cells show no significant association

with lnc-IM scores. B) Association of anti-tumor immune cells with high and low lnc-IM scores.

**Figure 2:** Association of lnc-IM scores with survival predictions in TCGA-SKCM cohort (n=101). Low lnc-IM group (n=59) is associated with better survival outcomes as compared to high lnc-IM group (n=42).

**Figure 3:** Multivariate analysis to identify any confounding variables. Only immunity count (lnc-IM scores) showed significance with survival predictions (TCGA-SKCM).

**Figure 4:** Comparison of overall response rate between high TMB category and high combined antigen score among all ICI treated cohorts.

**Figure 5:** Comparing true positive rate (TPR) and false negative rate (FNR) between high TMB and high combined antigen scores. High combined antigen scoring showed improved TPR of 85% as compared to high TMB (66%). FNR also showed improvement (14%) in high combined antigen classifier.

A

## Pro-tumor immune cells

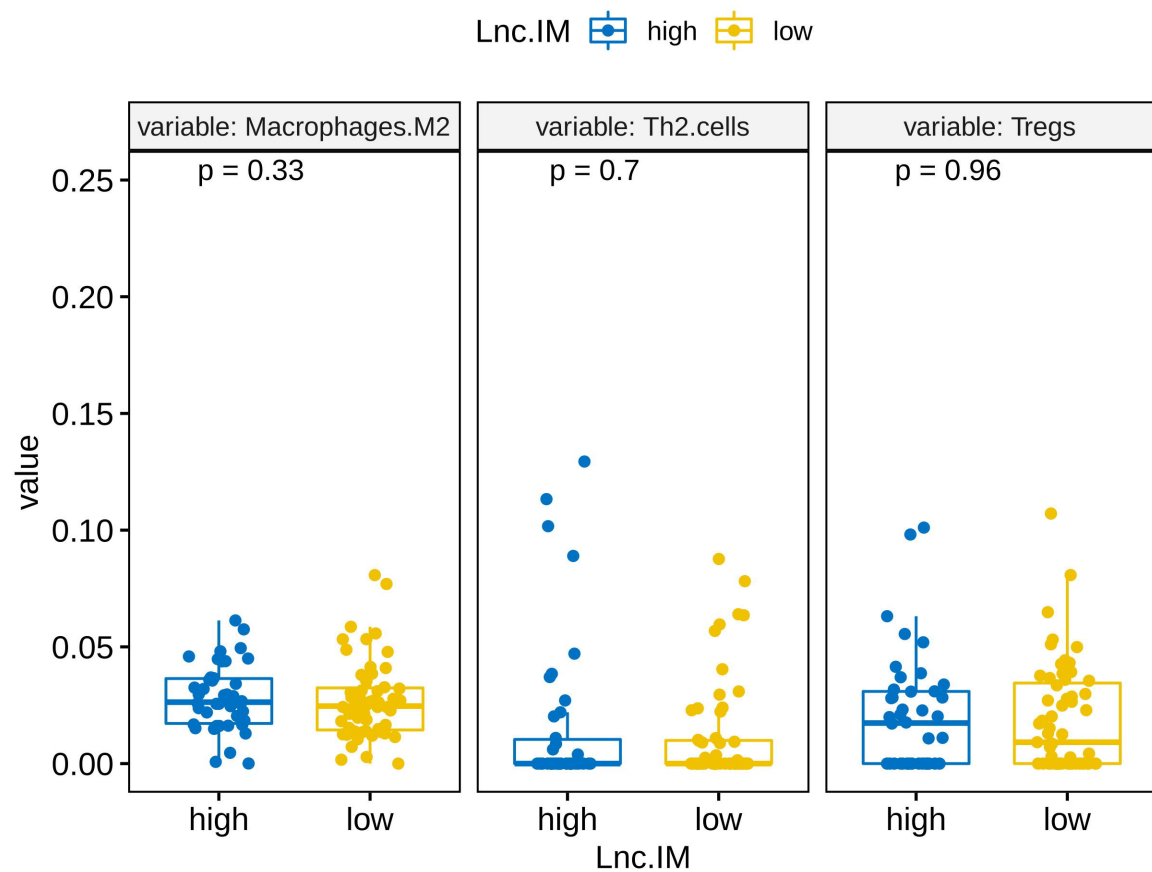

B

## Anti-tumor immune cells

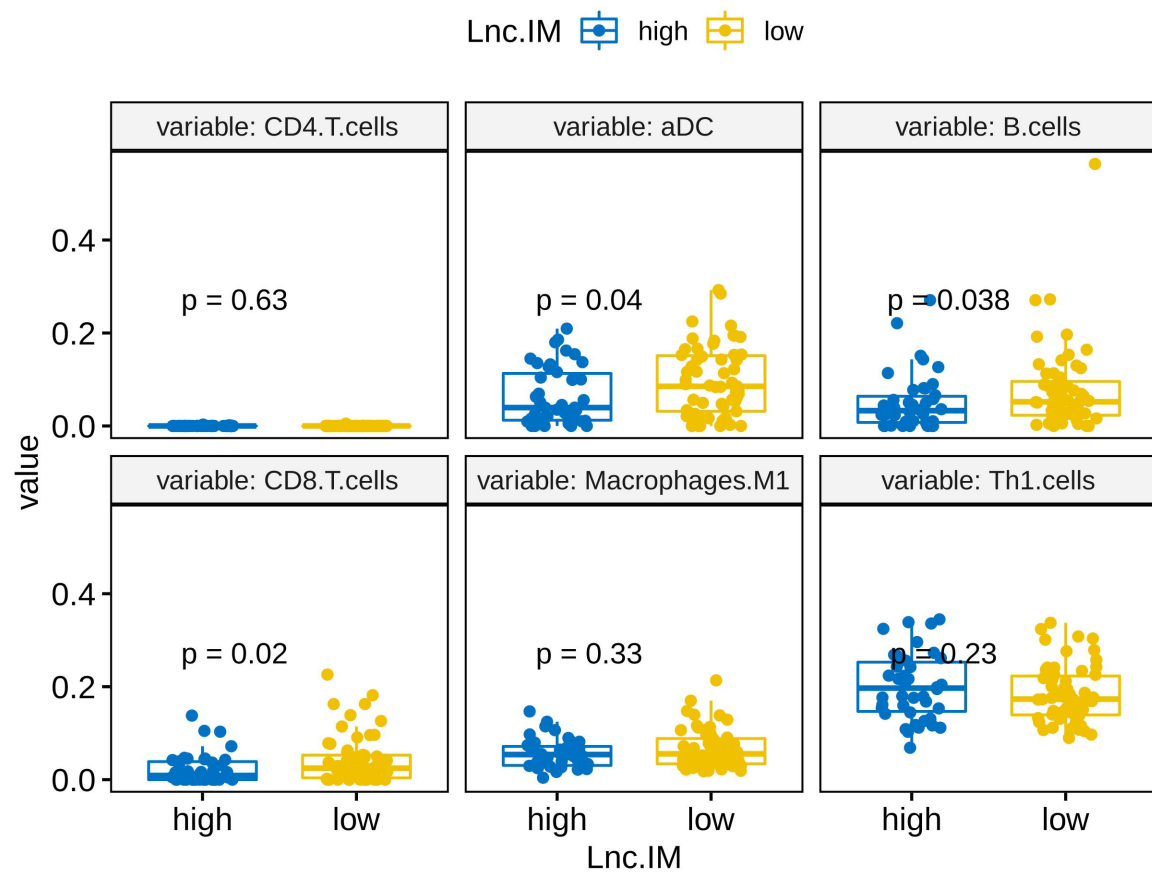

Strata Lnc.IM=high Lnc.IM=low

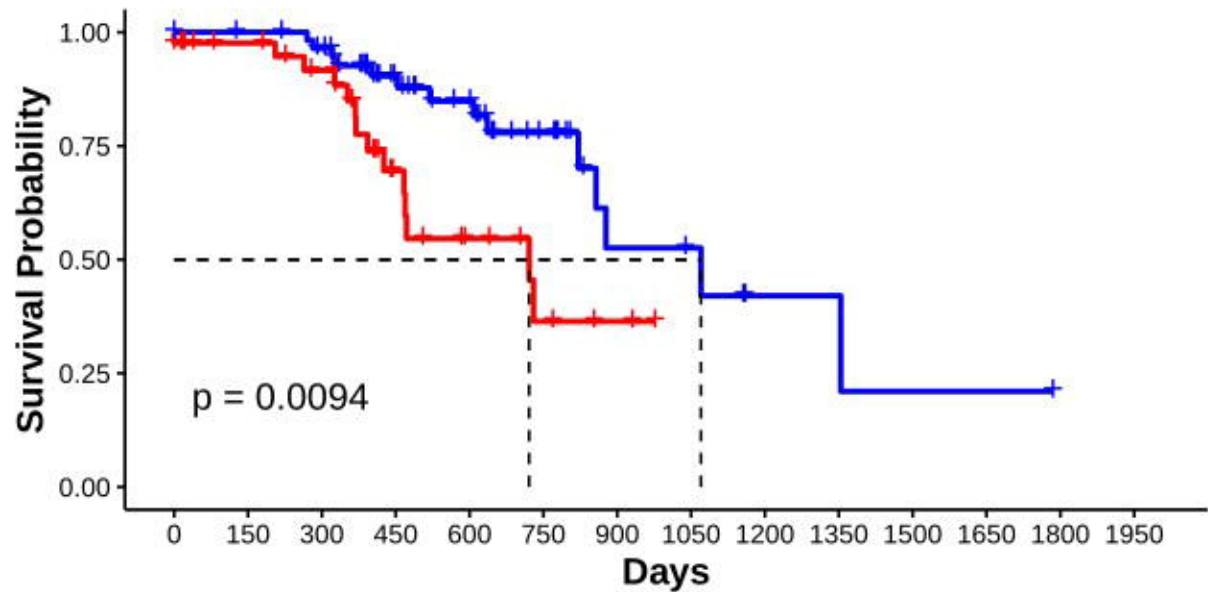

# Hazard ratio

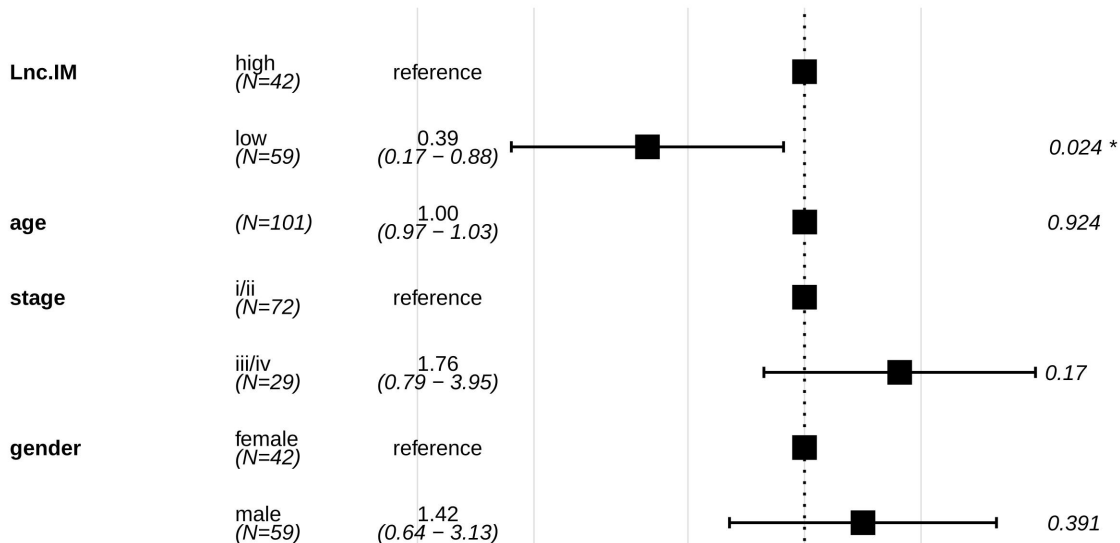

# Events: 28; Global p-value (Log-Rank): 0.07153

AIC: 203.52; Concordance Index: 0.69



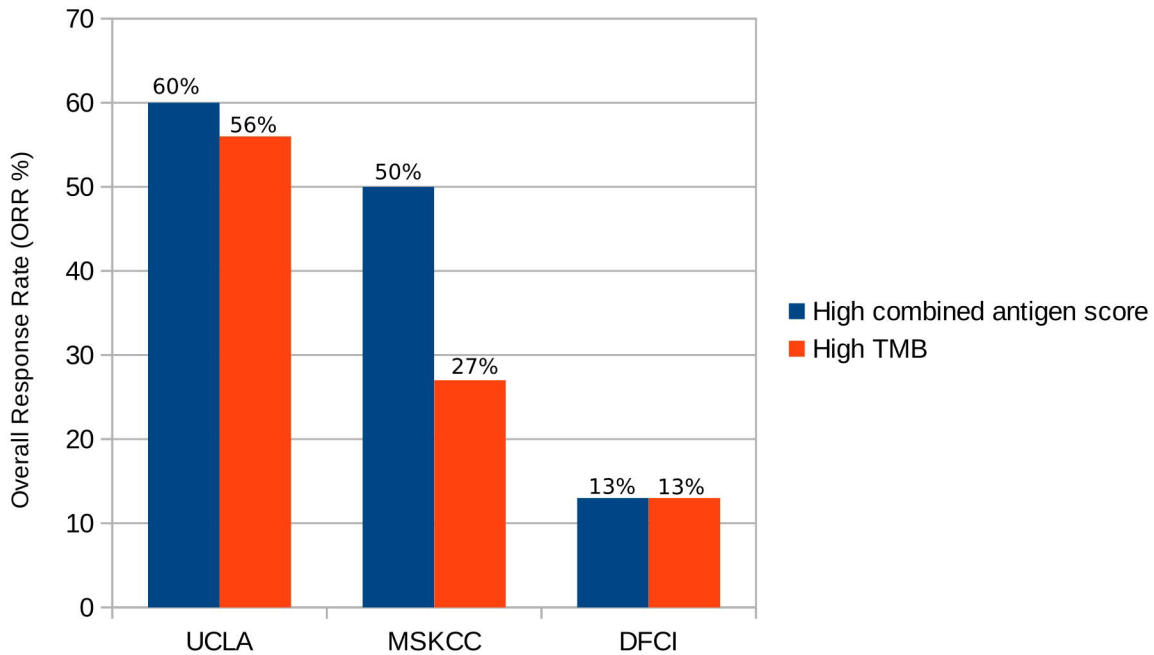

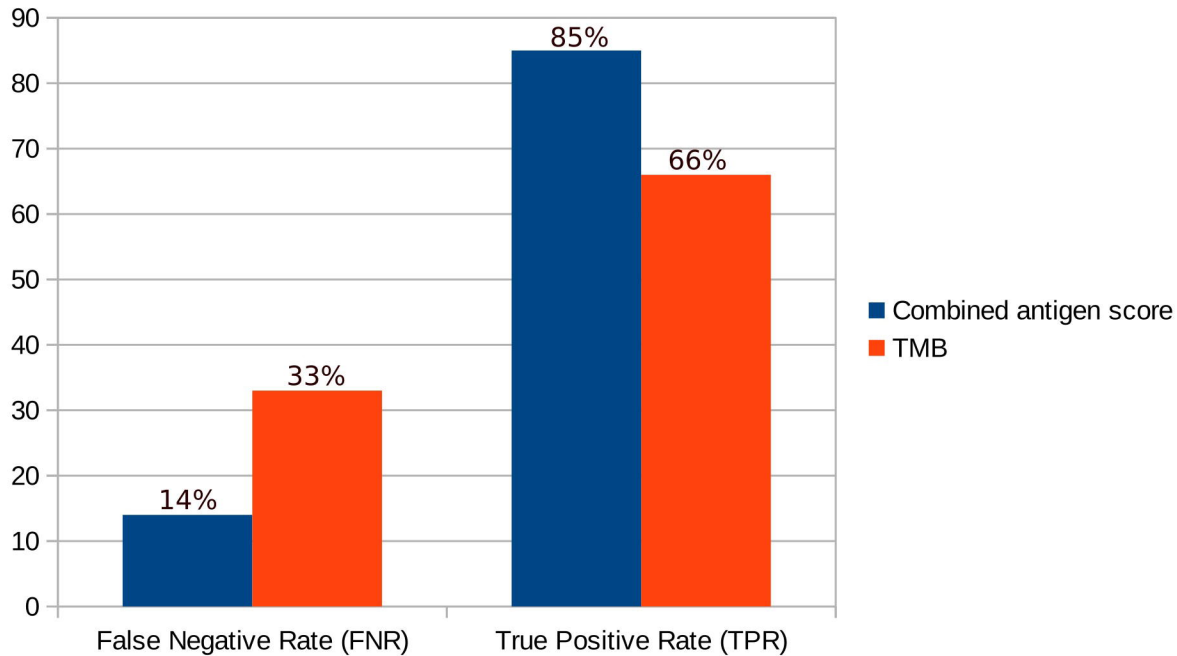

Source: http://medrxiv.org/content/10.1101/2023.05.30.23290735v1.full.pdf
